# Supplementary material for: Multi-annual variability of a new proxy-constrained modeled AMOC from 1450–1780 CE
Source: Copernicus journal article supplement (doi:10.5194/cp-2023-67), 2023-09-18
Supplement: Supplementary file 1 [file cp-2023-67-supplement.pdf]

# Multi-annual variability of a new proxy-constrained modeled AMOC from 1450-1780 CE

Eric Samakinwa<sup>1,2</sup>, Christoph C. Raible<sup>2,3</sup>, Ralf Hand<sup>1,2</sup>, Andrew R. Friedman<sup>1,2</sup>, and Stefan Brönnimann<sup>1,2</sup>

<sup>1</sup>Institute of Geography, University of Bern, Switzerland.

<sup>2</sup>Oeschger Center for Climate Change Research, University of Bern, Switzerland.

<sup>3</sup>Climate and Environmental Physics, Physics Institute, University of Bern, Bern, Switzerland.

**Correspondence:** Eric Samakinwa (eric.samakinwa@unibe.ch)

## Supplementary Material:

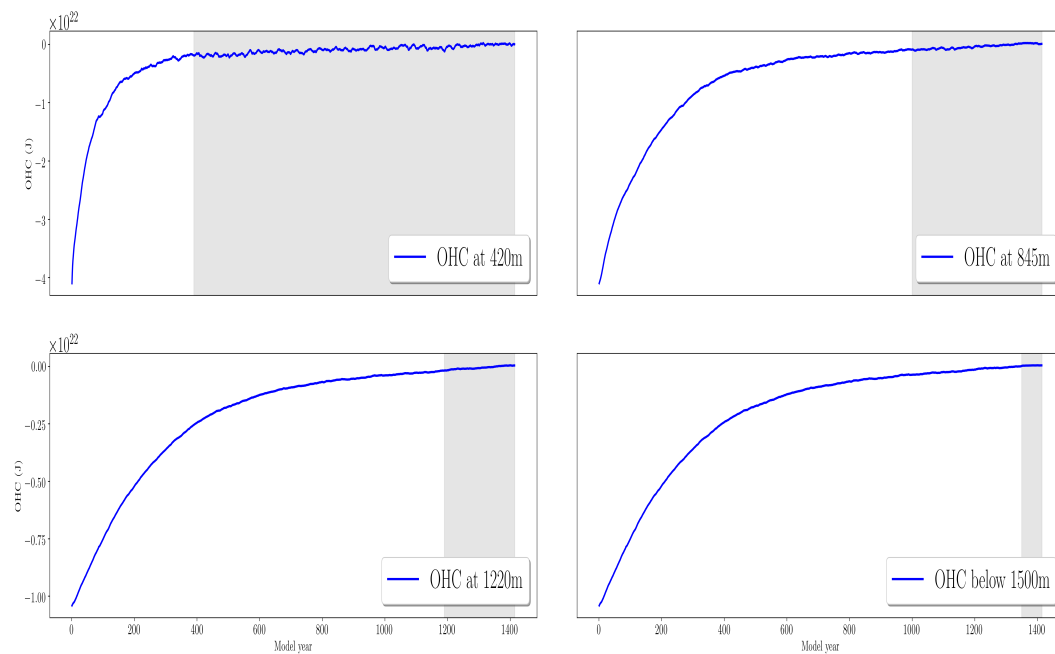

**Figure S1.** Time series of globally averaged changes in Ocean Heat Content OHC (J) showing that quasi-steady state is reached for 420, 825, 1220, and 1525 m, respectively.

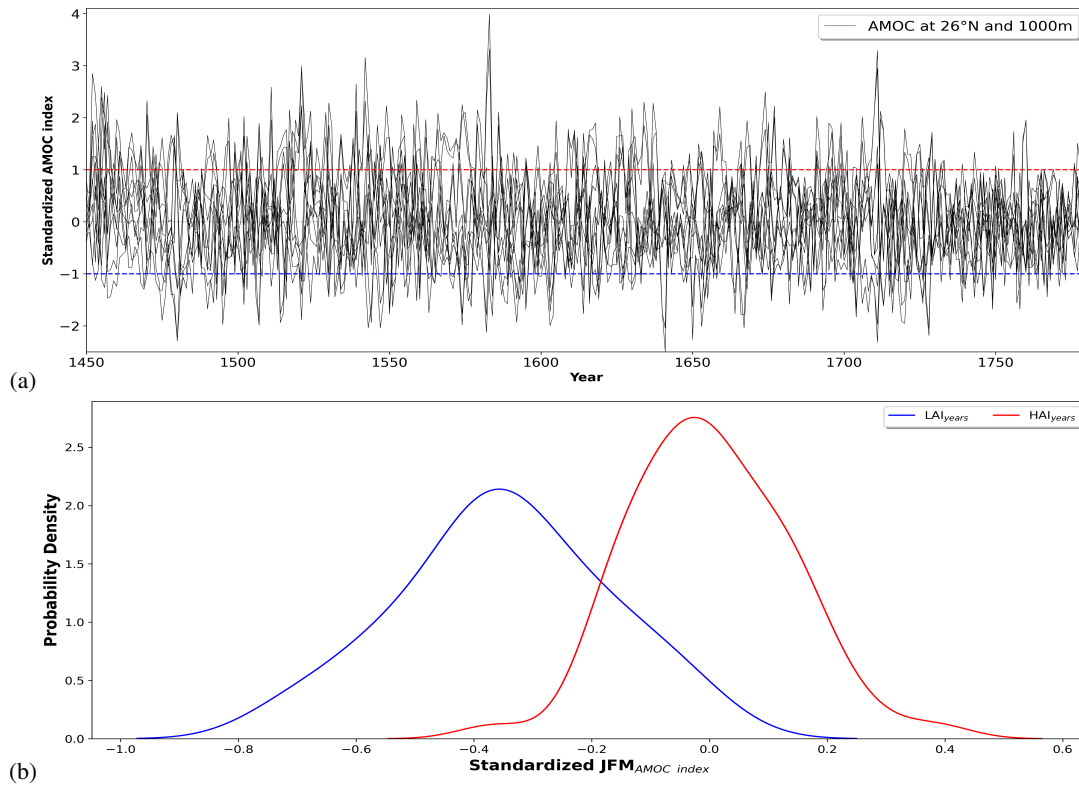

**Figure S2.** (a) Standardized AMOC index at 26°N and 1000 m depth, calculated for each ensemble member. The dashed red (blue) line delineates the years with the threshold of greater (smaller) than 1 (-1) standardized values. (b) Probability density distributions of standardized time series of the AMOC index at 26.5°N and 1000 m depth, for  $LAI_{year}$  (blue;  $N=329$ ) and  $HAI_{year}$  (red;  $N=428$ ).

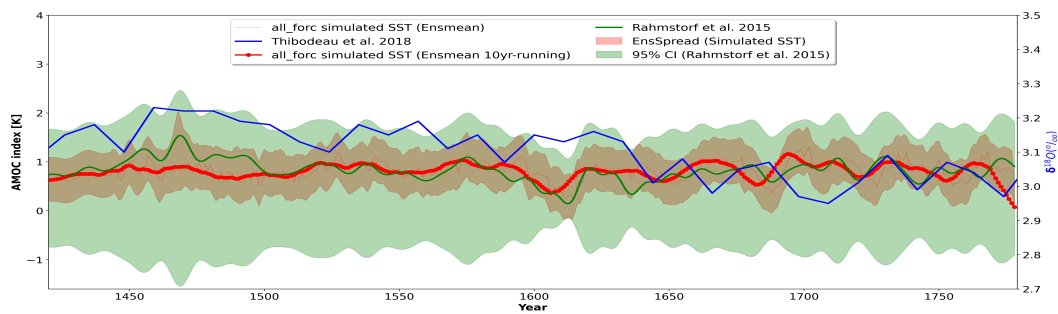

**Figure S3.** Comparison of SST-based AMOC index with available AMOC datasets covering 1421 - 1780. Shown are Rahmstorf et al., (2015) AMOC index (green) and its 95% confidence interval (shaded green), the corresponding values estimated from our simulated SST (red) from which 10-year running mean is calculated (thick red), and the ensemble spread (shaded red). We also show an AMOC proxy reconstruction based on  $\delta^{18}O$  (blue) in benthic foraminifera from sediment cores (Thibodeau et al., 2018).

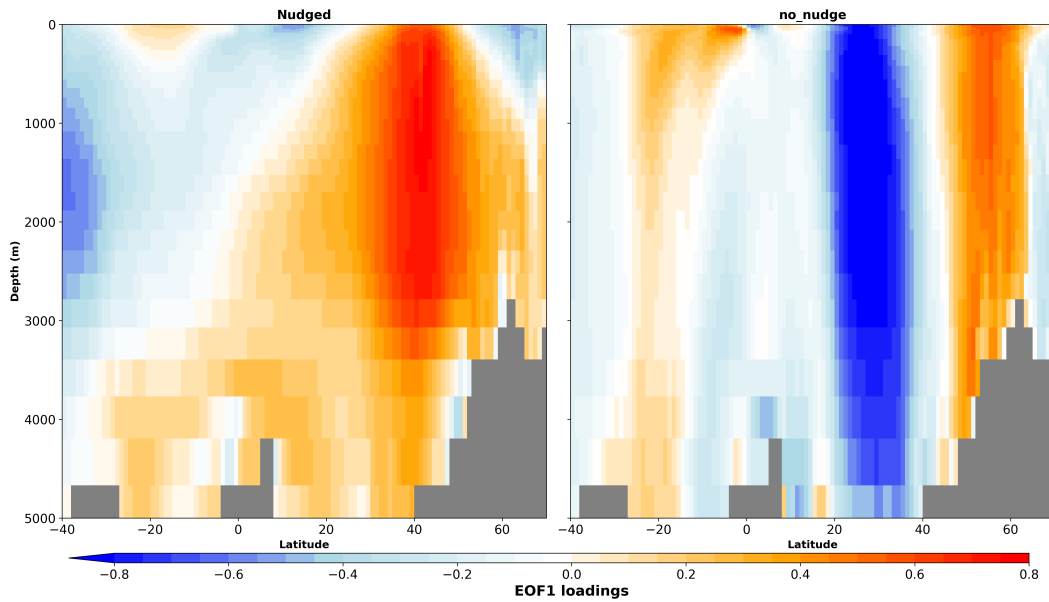

**Figure S4.** Leading Empirical Orthogonal Function (EOF1) of the meridional overturning stream function for SST *nudged* and Constant SST (*no\_nudge*) simulation, respectively. The amplitude corresponds to a normalized PC with unit variance.

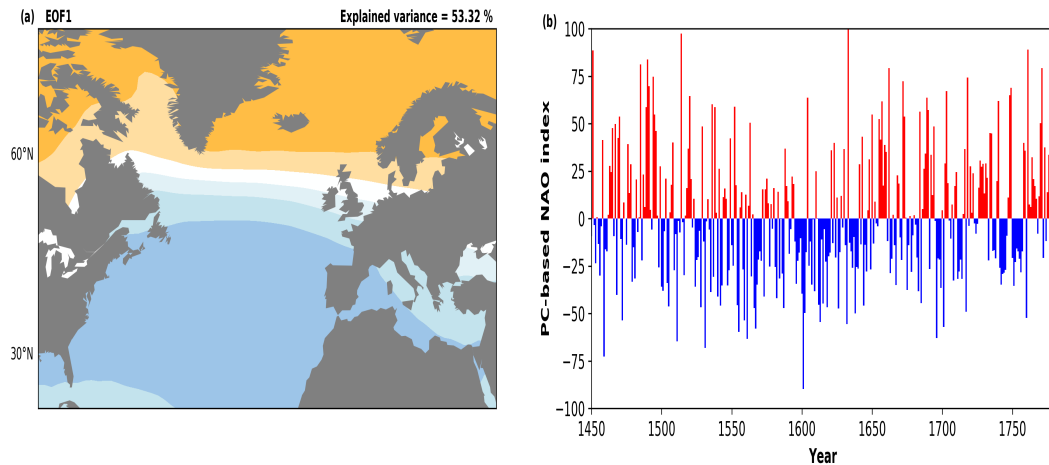

**Figure S5.** Empirical Orthogonal Function (EOF1) and PC-based NAO index calculated as the first principal component over the Atlantic sector (20°-80°N, 90°W-40°E) for JFM mean SLP for 1450 – 1780.

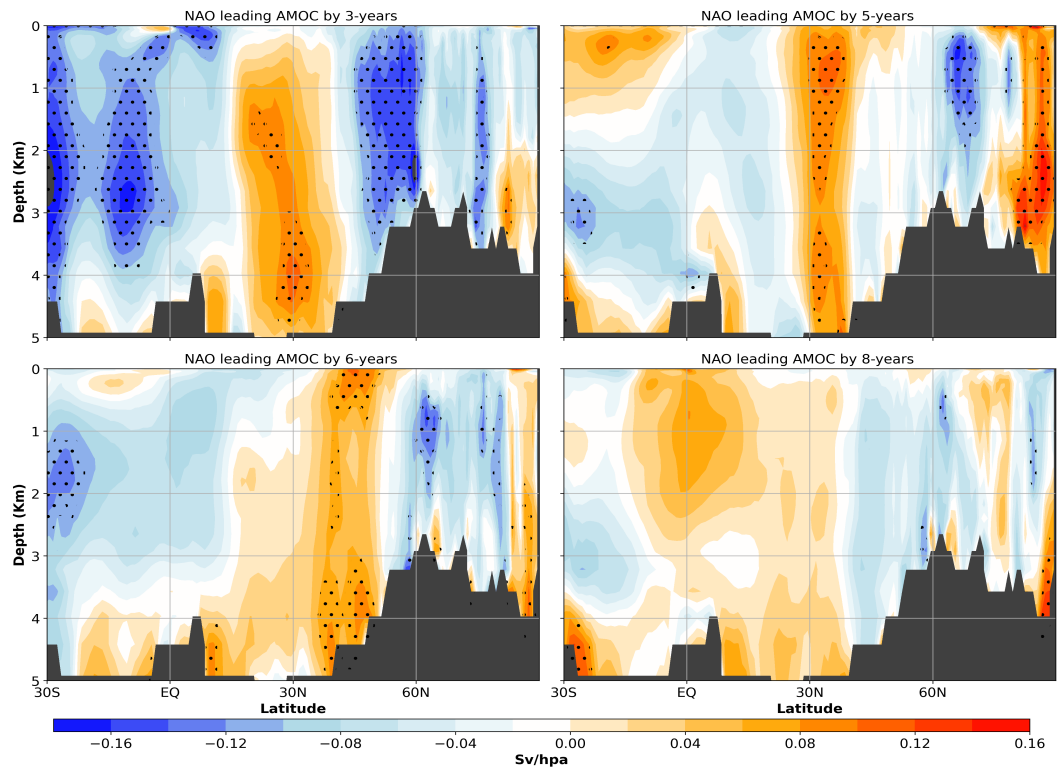

**Figure S6.** Lag-regression of the normalized NAO-index on the Atlantic meridional overturning stream function for 3, 5, 6, and 8 years, respectively. Stippling indicates significance at the 95% confidence interval.
